# Supplementary material
Source: publisher site journal article supplement (https://www.dovepress.com/article/476277)
Supplement: Supplementary file 1 [file get_supplementary_file.php]

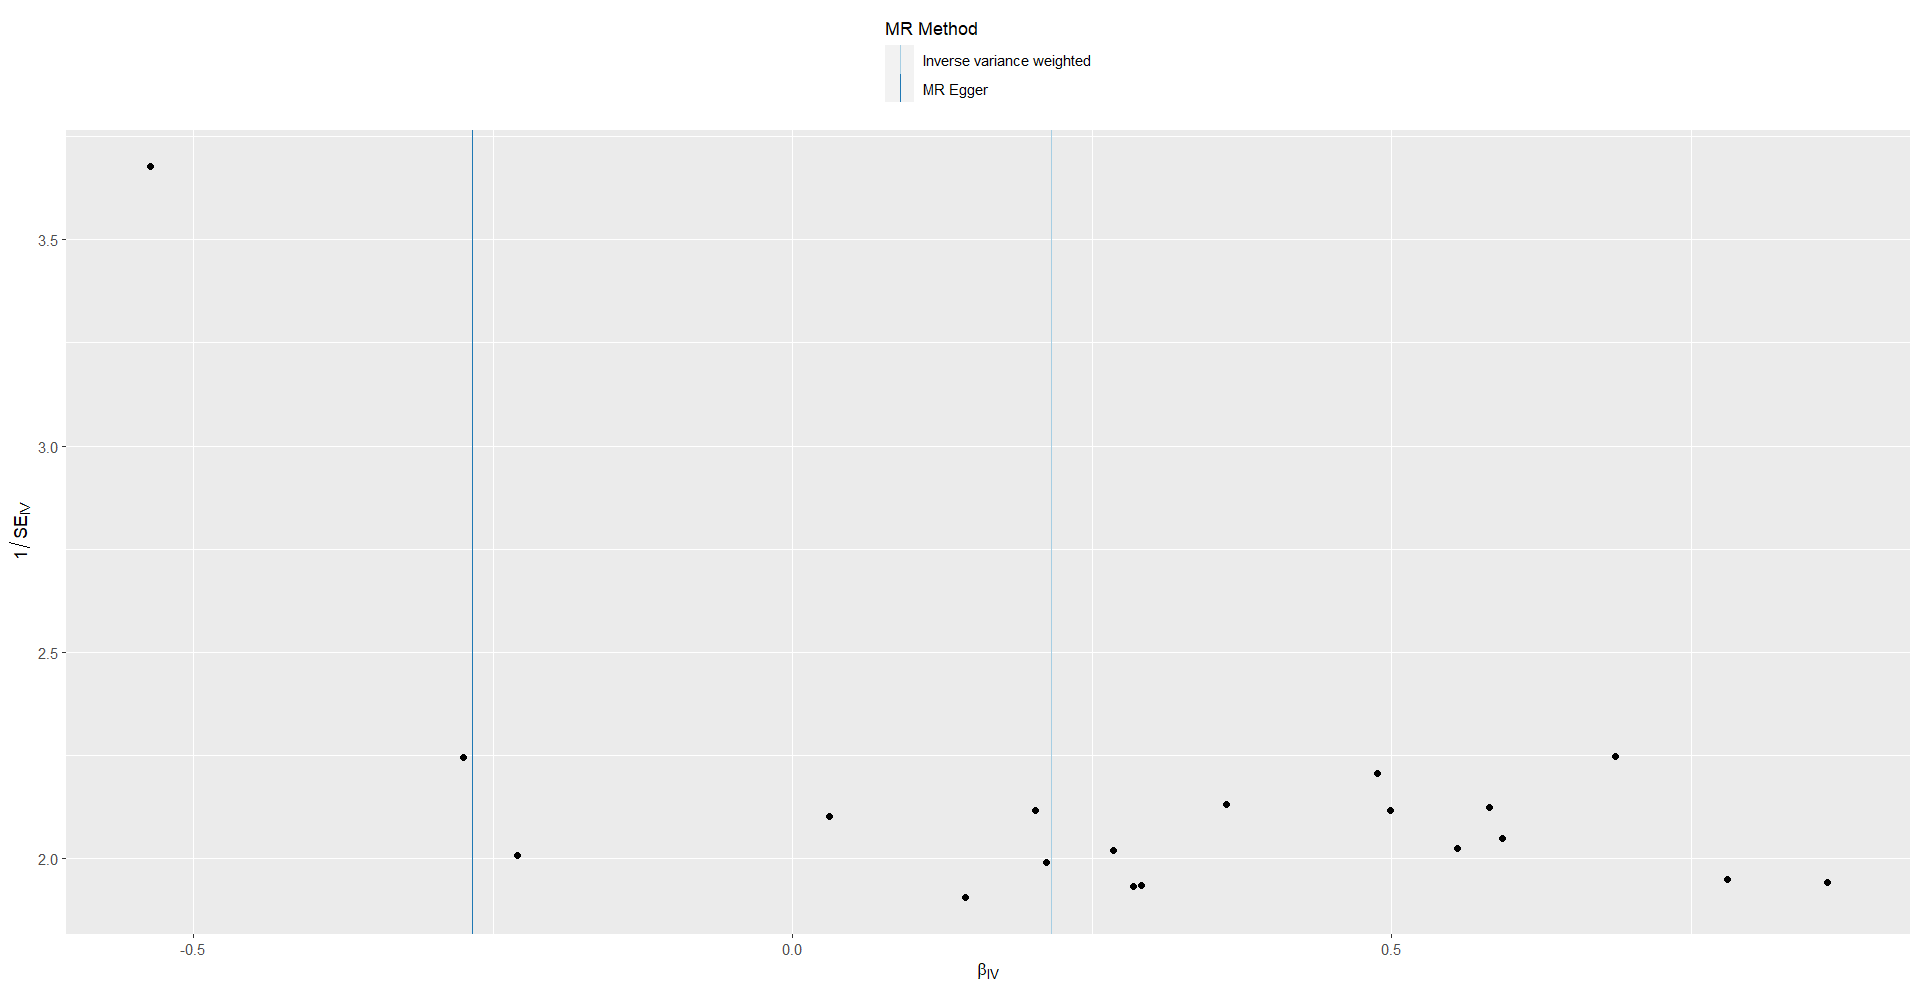


Supplementary Figure 1. The funnel plot to detect whether the protentional heterogeneity of obstructive sleep apnea on temporomandibular disorders.


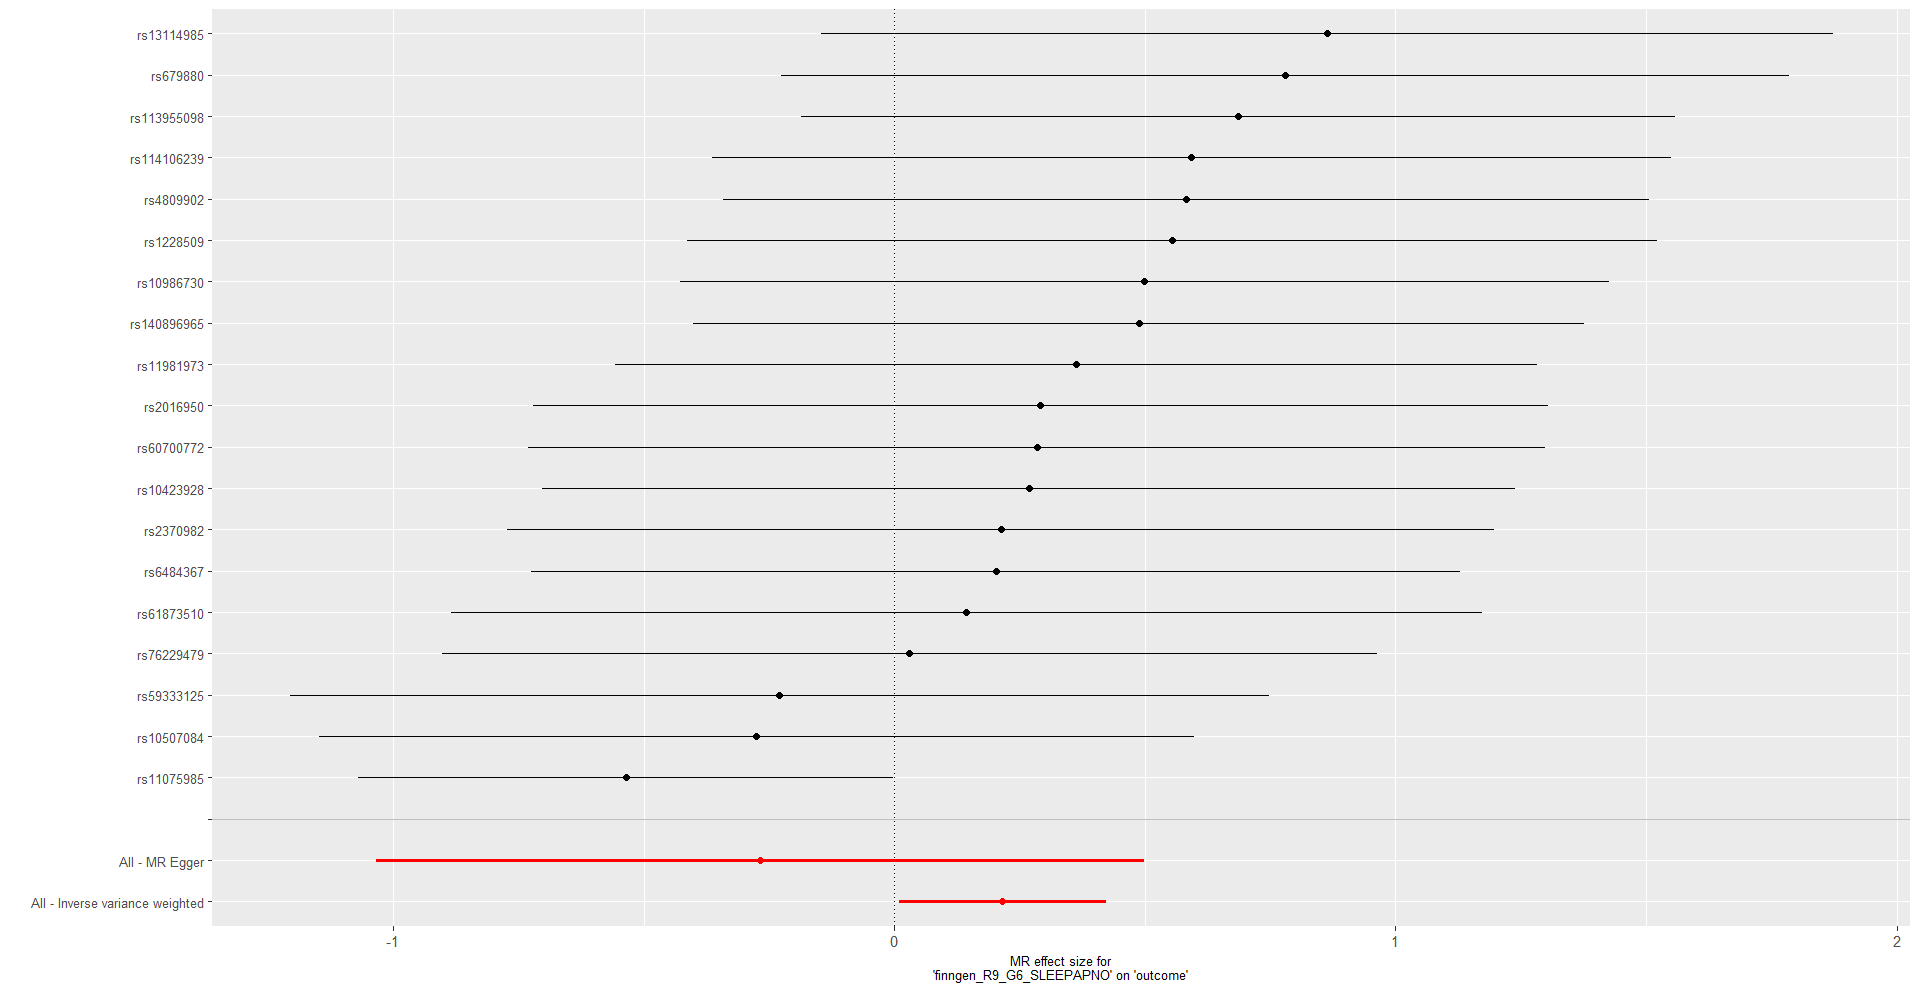


Supplementary Figure 2. The forest plot of causal effect of obstructive sleep apnea on temporomandibular disorders.


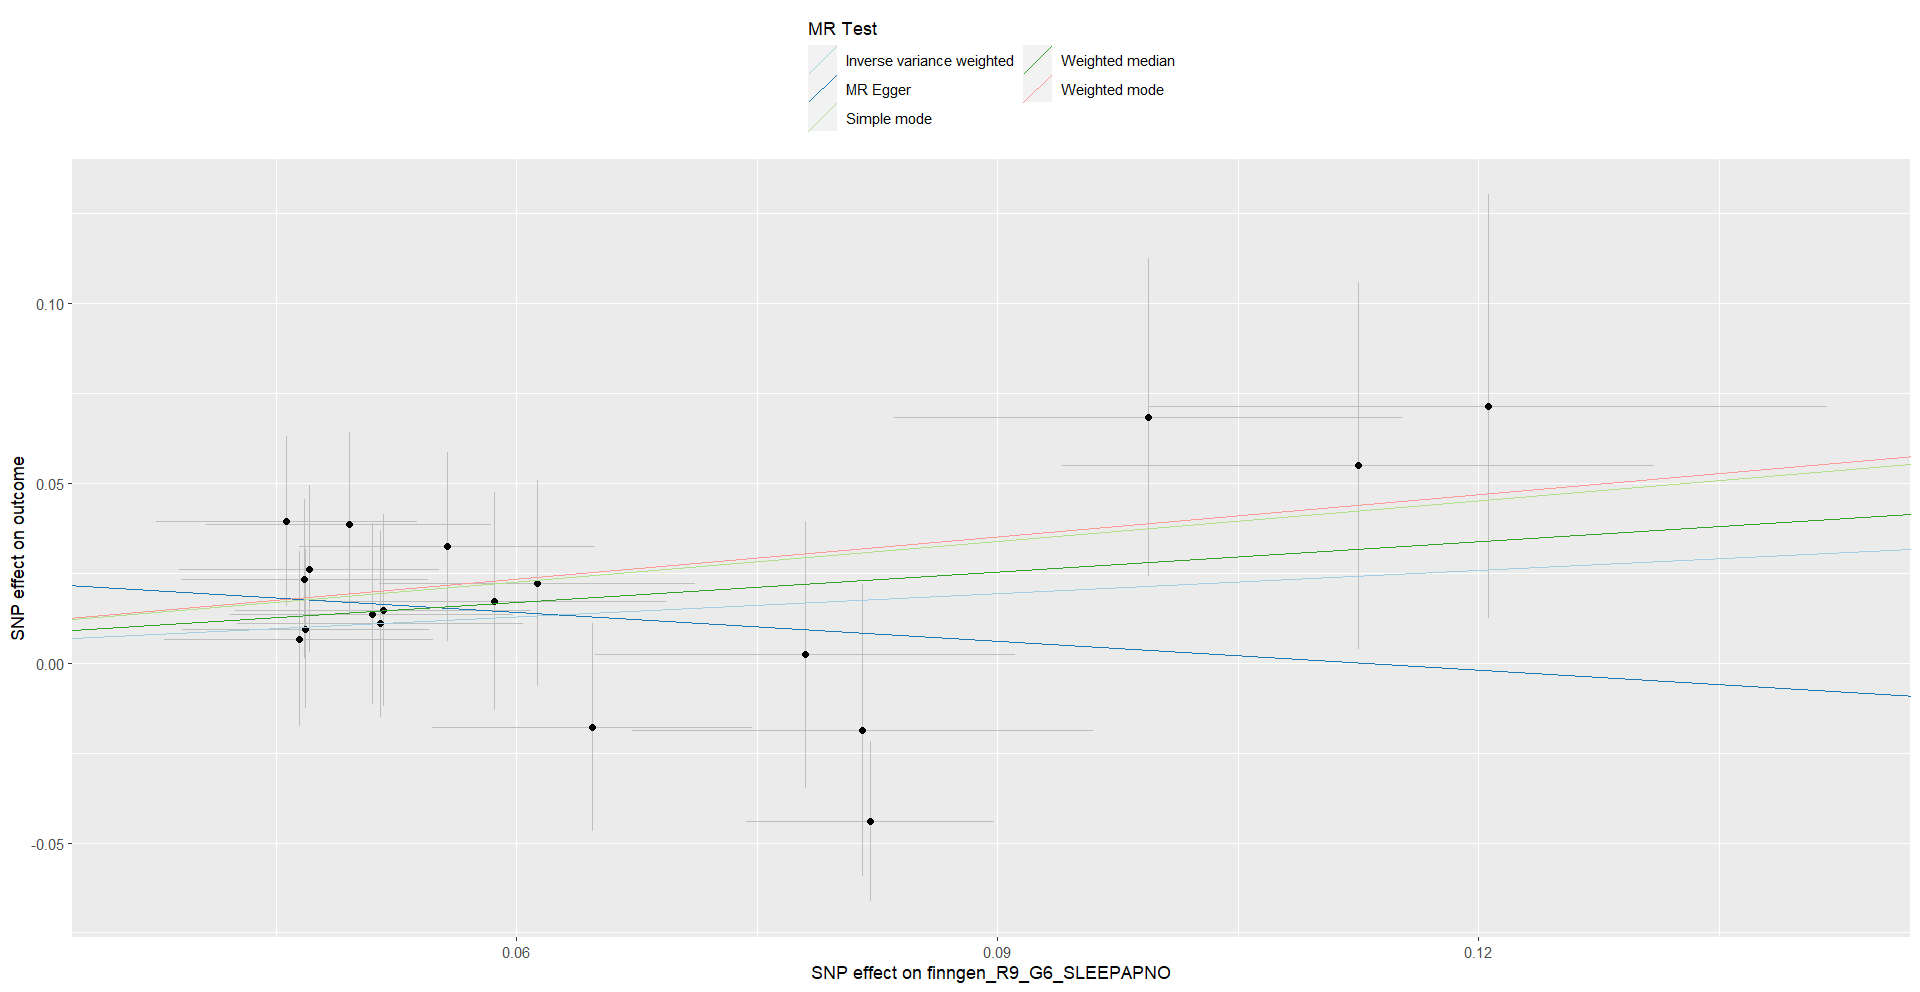


Supplementary Figure 3. The scatter plot of causal effect of obstructive sleep apnea on temporomandibular disorders.


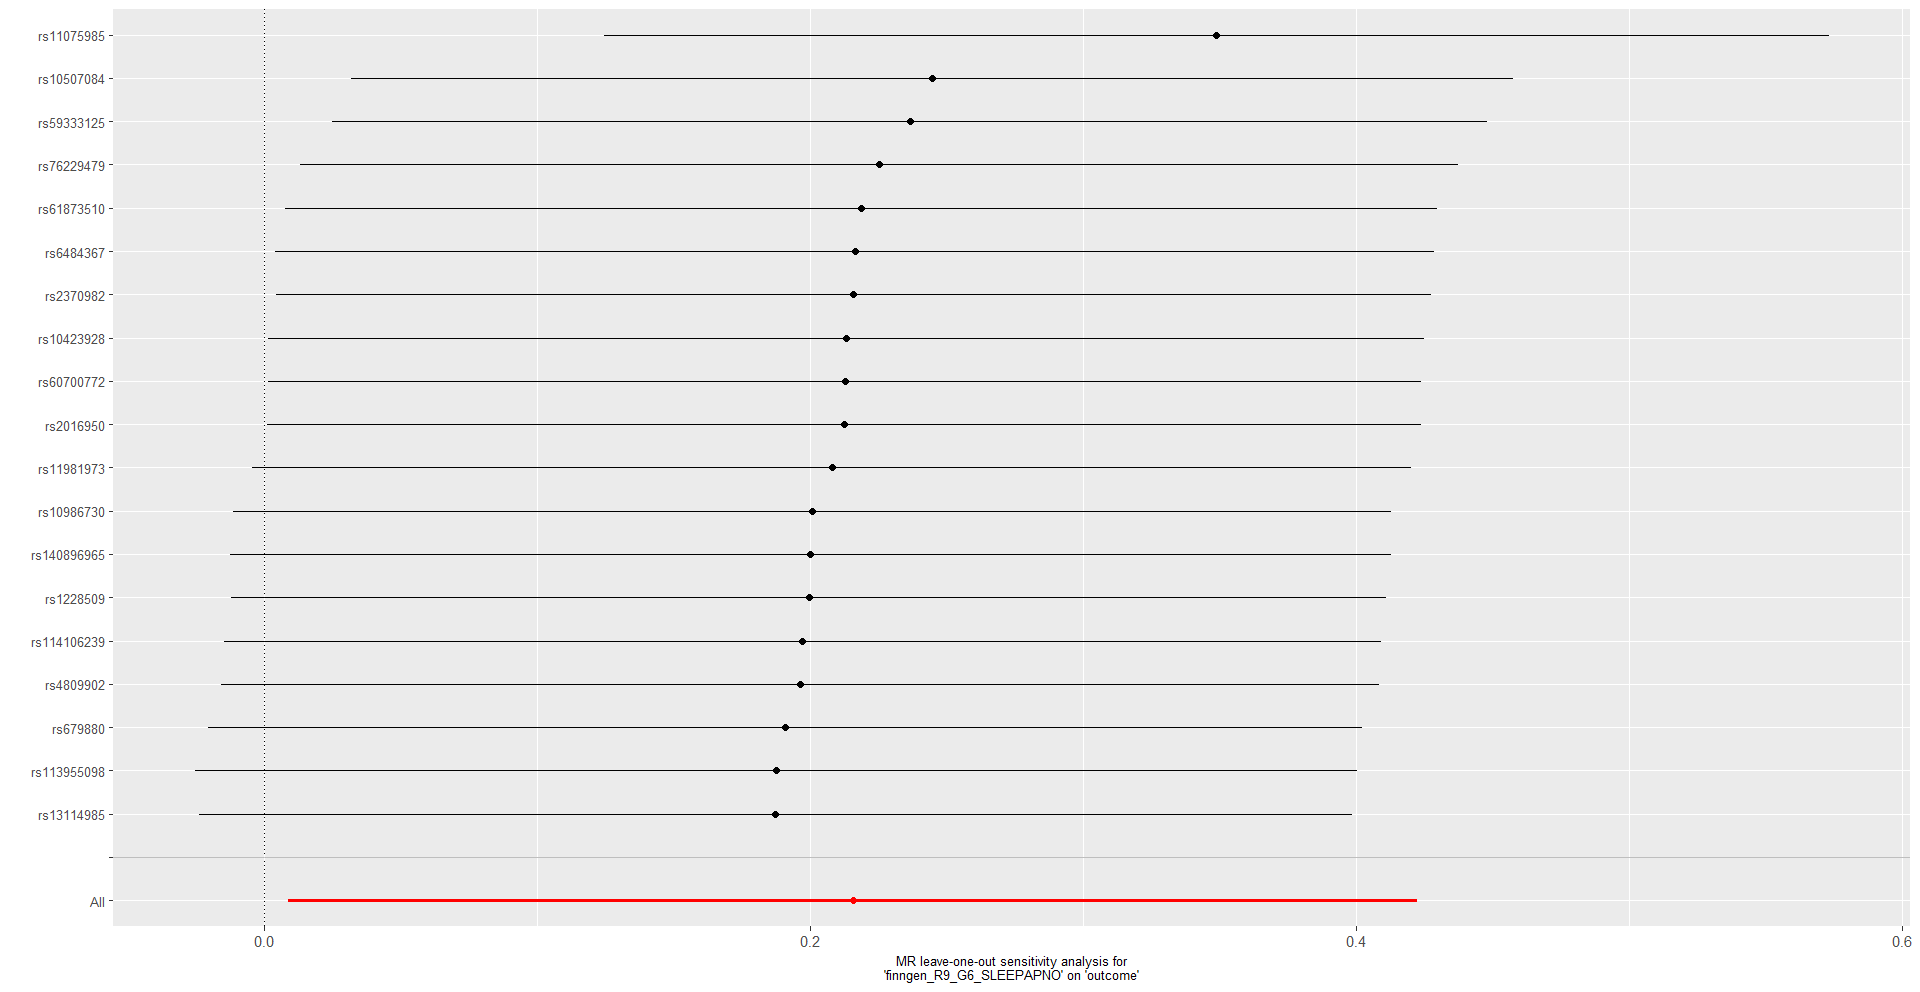


Supplementary Figure 4. The forest plot of “leave-one-out” sensitivity analysis method to show the influence of individual SNPs on the results of obstructive sleep apnea on temporomandibular disorders.


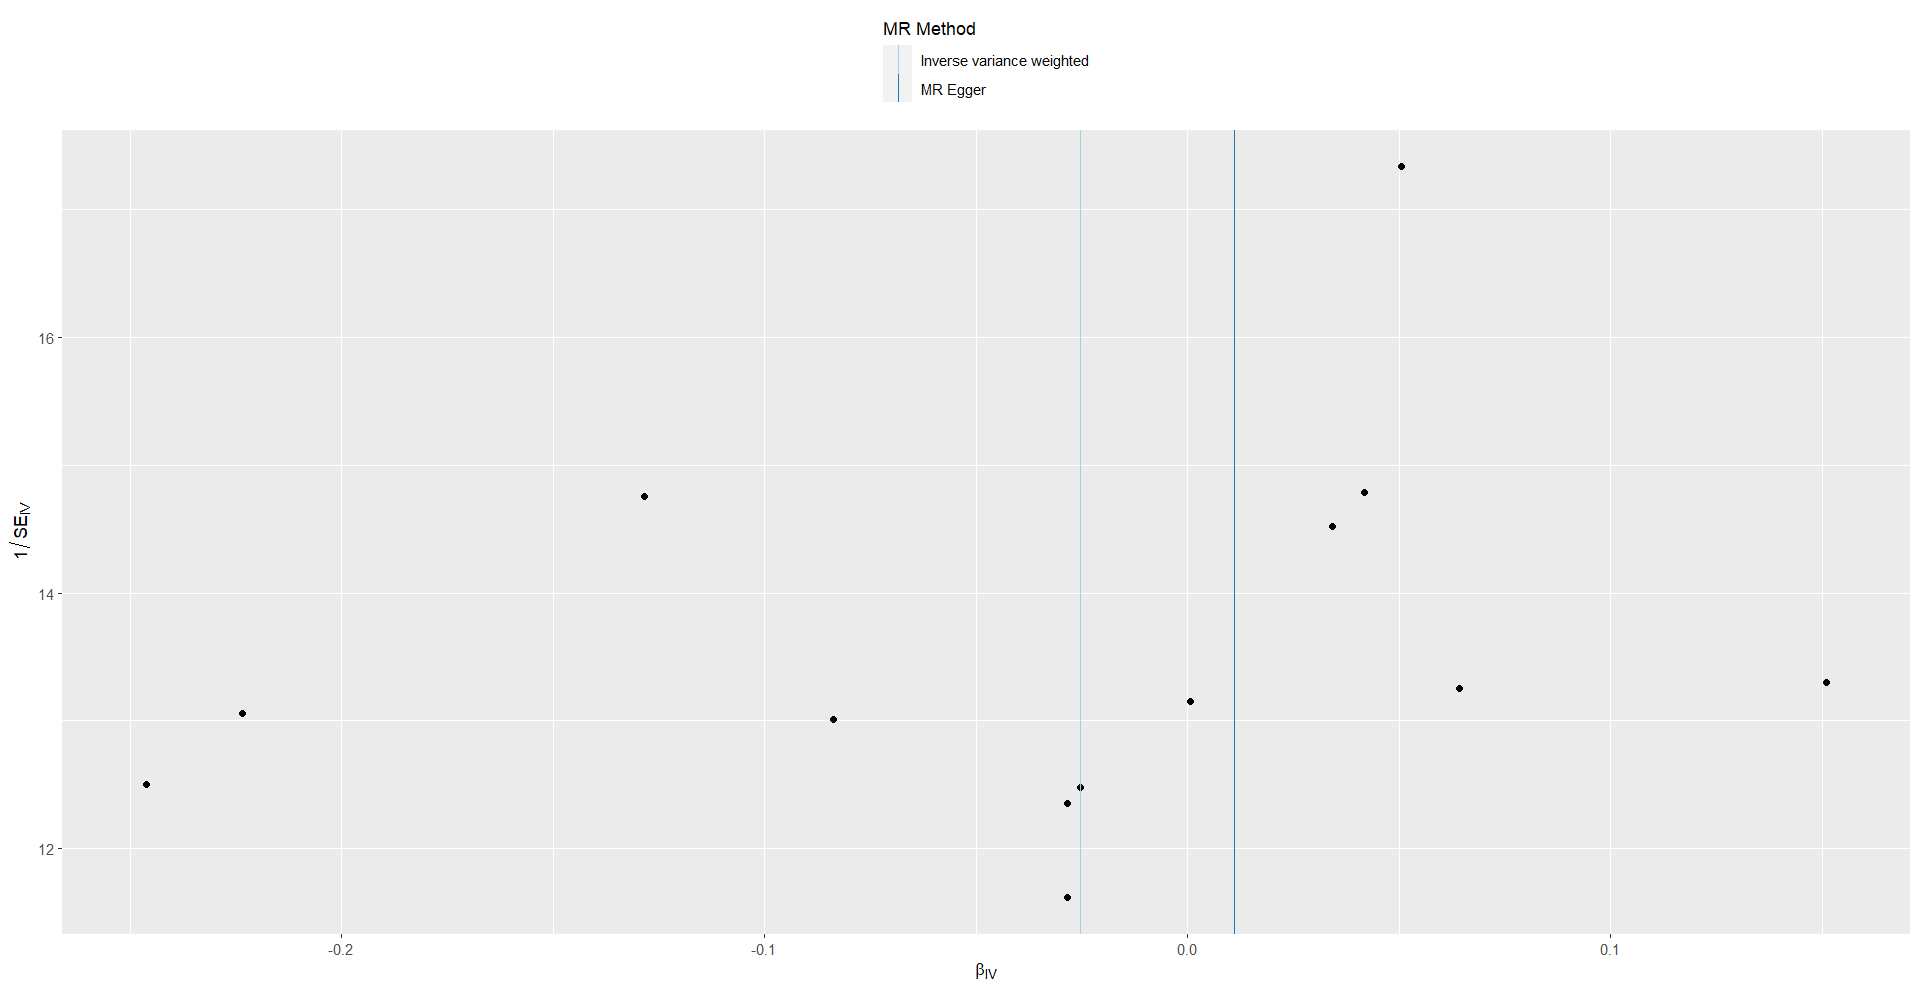


Supplementary Figure 5. The funnel plot to detect whether the protentional heterogeneity of temporomandibular disorders on obstructive sleep apnea.


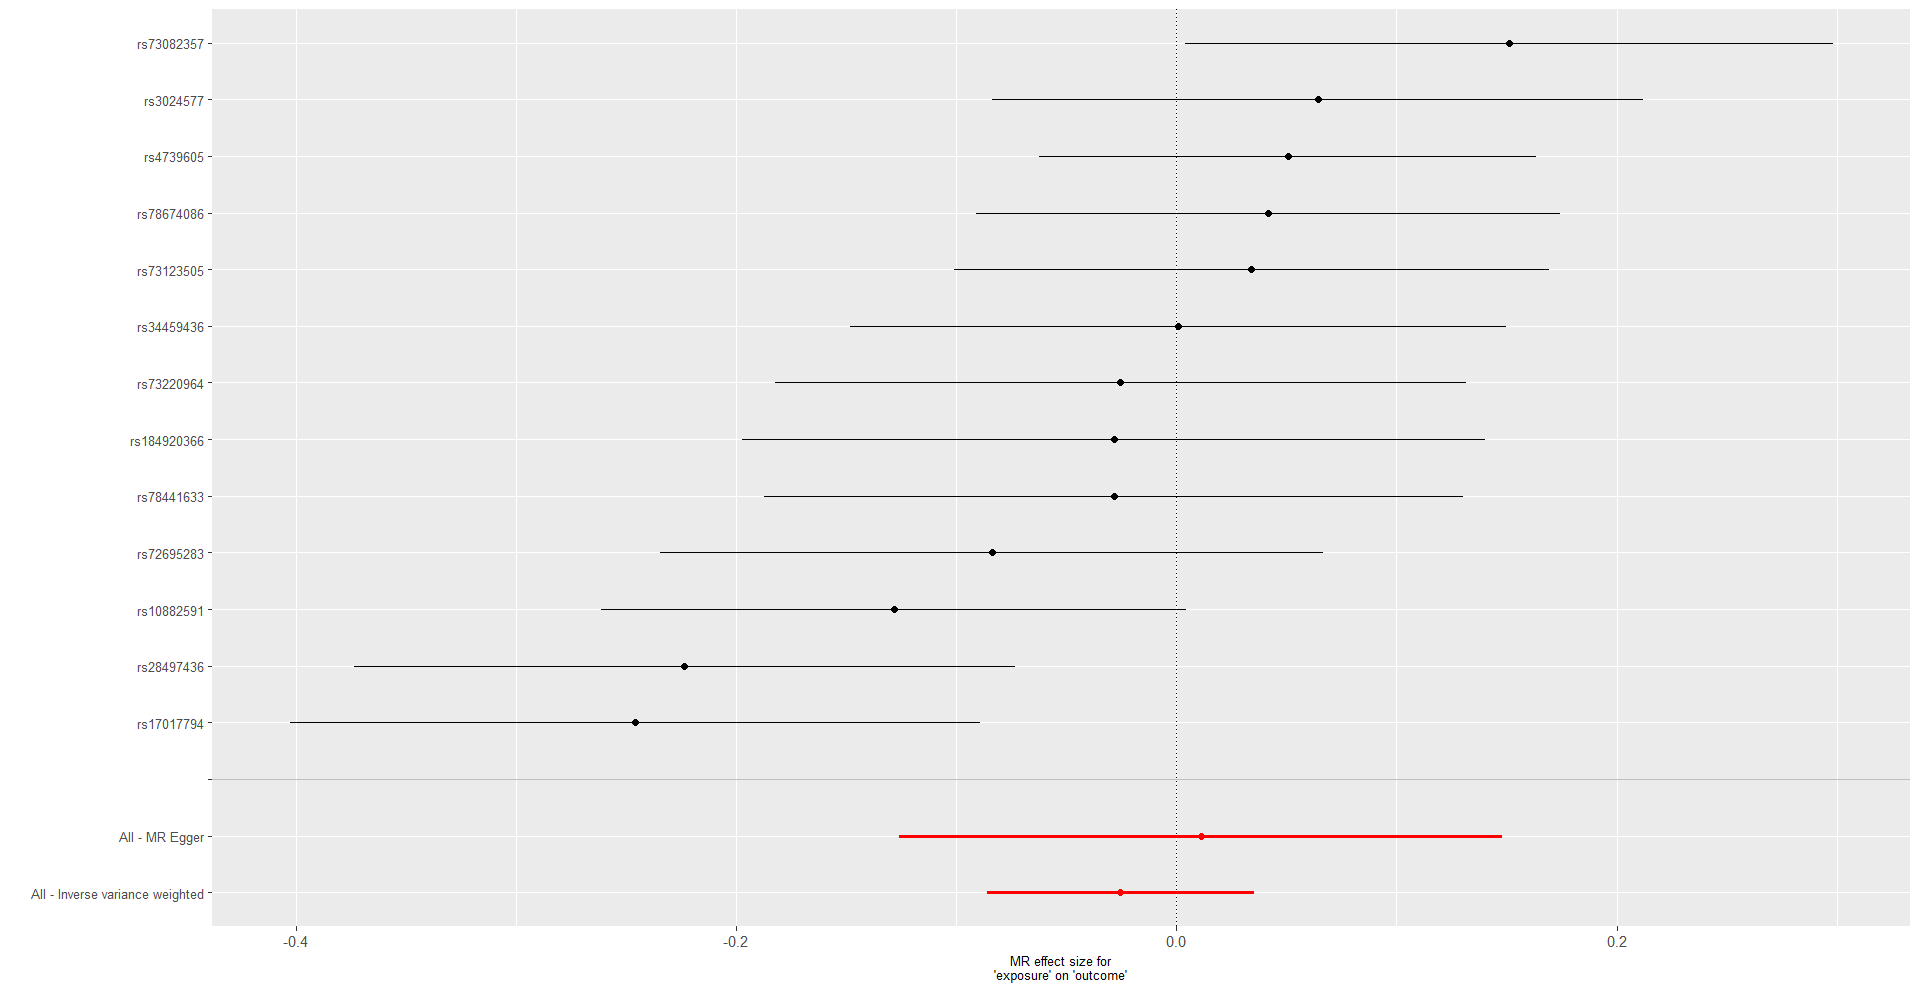


Supplementary Figure 6. The forest plot of causal effect of temporomandibular disorders on obstructive sleep apnea.


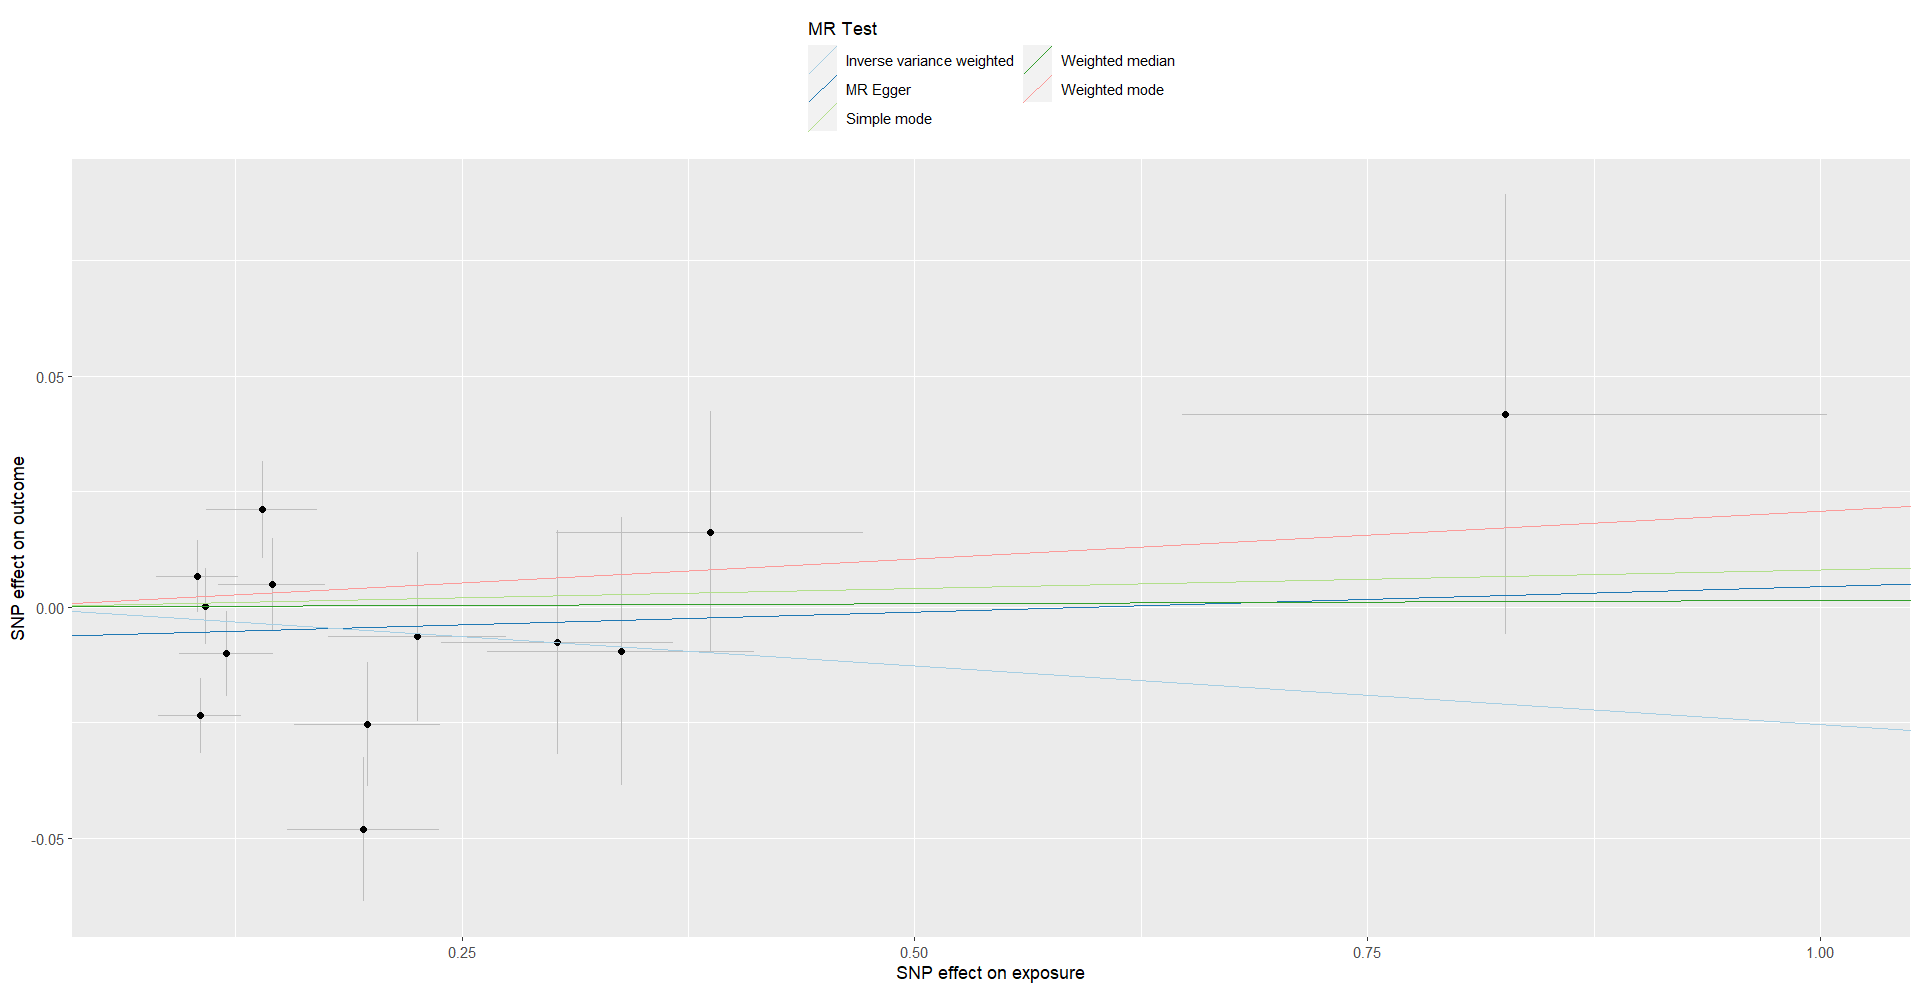


Supplementary Figure 7. The scatter plot of causal effect of temporomandibular disorders on obstructive sleep apnea.


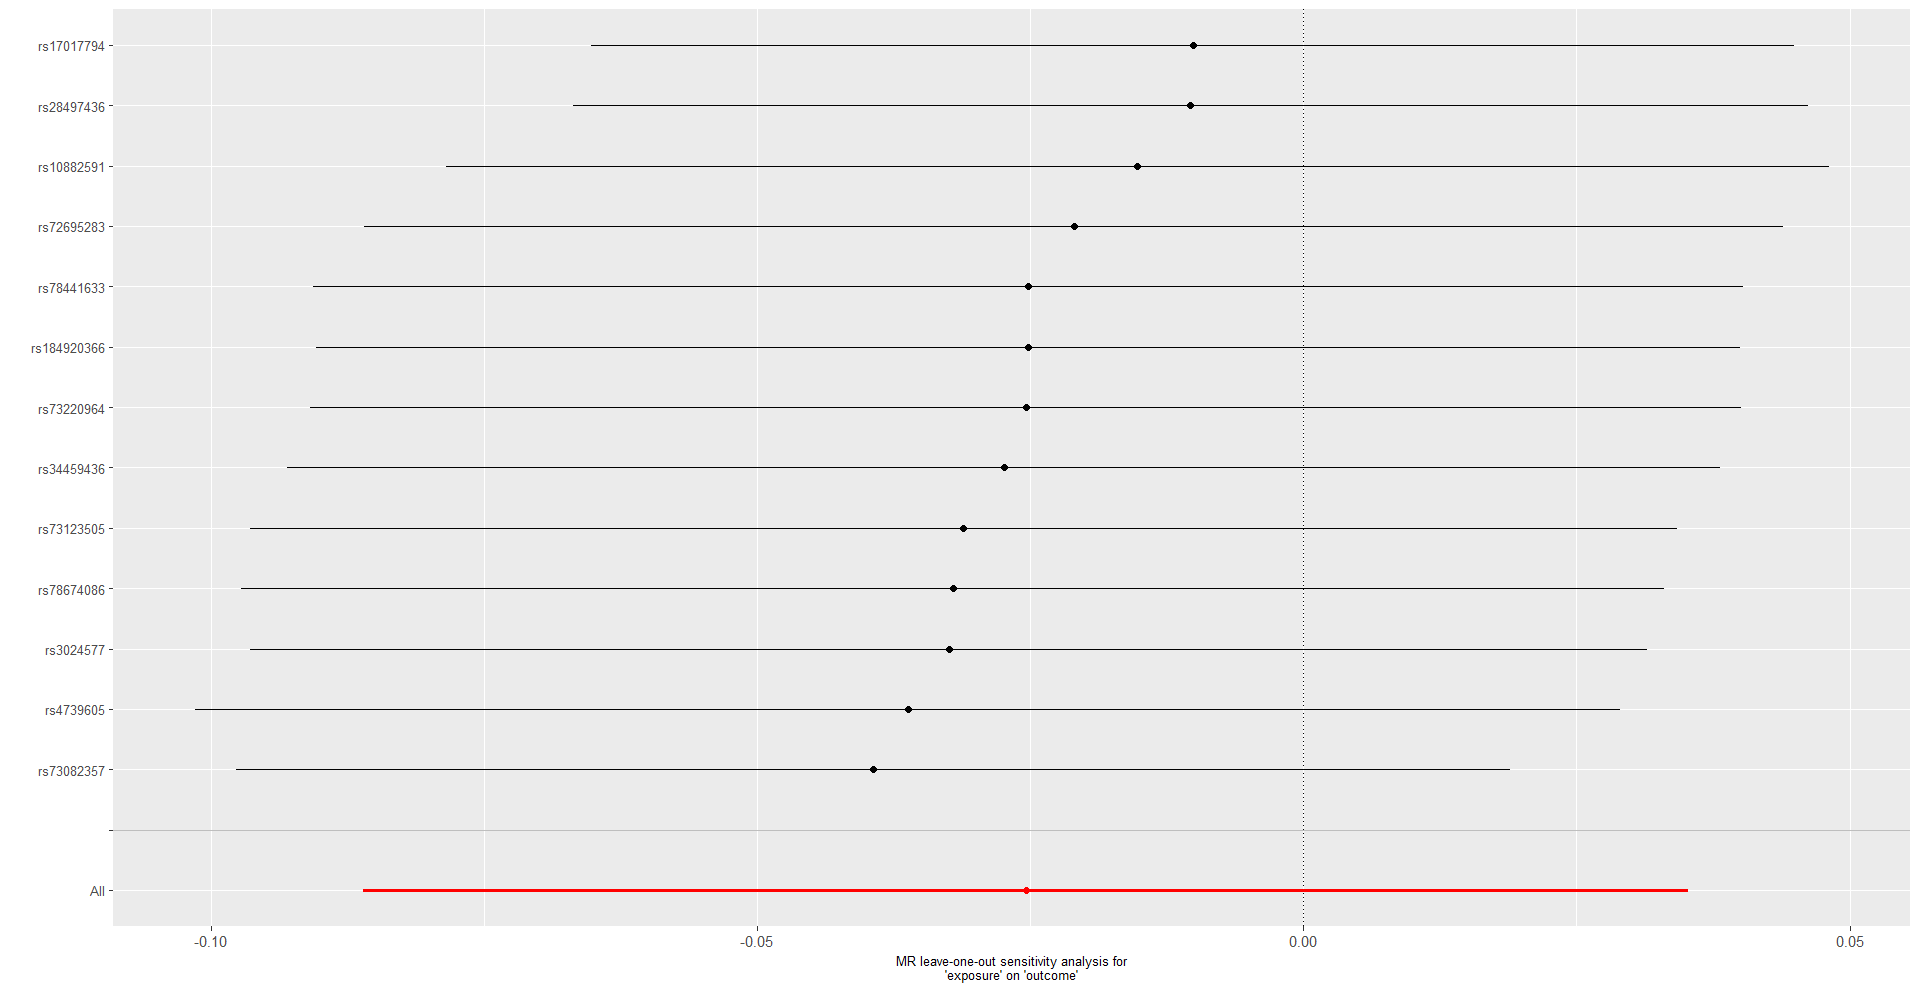


Supplementary Figure 8. The forest plot of “leave-one-out” sensitivity analysis method to show the influence of individual SNPs on the results of temporomandibular disorders on obstructive sleep apnea.

Supplementary Table 1. Detail information of selected SNPs for MR analysis in OSA and TMD.

| SNP | EA | OA | Exposure (SA) | | | | |  | Outcome (TMD) | | | |
| --- | --- | --- | --- | --- | --- | --- | --- | --- | --- | --- | --- | --- |
| F | Beta | Se | P-value | EAF |  | Beta | Se | P-value | EAF |
| rs10423928 | T | A | 374.8247 | -0.051 | 0.0088 | 7.55E-09 | 0.2586 |  | -0.01367 | 0.025261 | 0.588447 | 0.25916 |
| rs10507084 | C | T | 464.2537 | 0.0647 | 0.01 | 8.23E-11 | 0.1794 |  | -0.01781 | 0.028853 | 0.537045 | 0.177921 |
| rs10986730 | C | T | 410.8218 | -0.0468 | 0.0077 | 1.16E-09 | 0.5242 |  | -0.02334 | 0.022118 | 0.29131 | 0.523598 |
| rs11075985 | C | A | 1243.01 | 0.0821 | 0.0077 | 2.15E-26 | 0.4287 |  | -0.04399 | 0.022316 | 0.048699 | 0.427652 |
| rs113955098 | G | A | 468.0613 | -0.0994 | 0.0158 | 3.38E-10 | 0.0675 |  | -0.06825 | 0.04424 | 0.122907 | 0.067849 |
| rs114106239 | C | T | 390.837 | -0.1206 | 0.0212 | 1.19E-08 | 0.0371 |  | -0.07144 | 0.058874 | 0.224952 | 0.037067 |
| rs11981973 | A | G | 419.8403 | 0.0613 | 0.0098 | 4.72E-10 | 0.1816 |  | 0.022166 | 0.02876 | 0.440878 | 0.180036 |
| rs1228509 | A | C | 376.2625 | 0.0471 | 0.0081 | 6.41E-09 | 0.6562 |  | 0.026113 | 0.023256 | 0.261498 | 0.655586 |
| rs13114985 | T | G | 351.227 | 0.0457 | 0.0081 | 2.01E-08 | 0.3383 |  | 0.039433 | 0.023539 | 0.093895 | 0.336075 |
| rs140896965 | C | T | 444.0063 | -0.1125 | 0.0185 | 1.11E-09 | 0.049 |  | -0.0549 | 0.051018 | 0.281915 | 0.049005 |
| rs2016950 | C | T | 343.8964 | -0.0586 | 0.0107 | 4.13E-08 | 0.158 |  | -0.01707 | 0.0303 | 0.573241 | 0.159399 |
| rs2370982 | C | T | 362.1206 | 0.0515 | 0.0089 | 7.97E-09 | 0.2382 |  | 0.010924 | 0.025896 | 0.673133 | 0.237932 |
| rs4809902 | G | C | 411.133 | -0.0557 | 0.0092 | 1.51E-09 | 0.2285 |  | -0.0324 | 0.026233 | 0.216822 | 0.229649 |
| rs59333125 | A | C | 371.5678 | -0.0816 | 0.0144 | 1.32E-08 | 0.0807 |  | 0.018751 | 0.040657 | 0.644649 | 0.080301 |
| rs60700772 | T | C | 346.2189 | 0.0517 | 0.0092 | 2.20E-08 | 0.2212 |  | 0.014681 | 0.026767 | 0.583356 | 0.220898 |
| rs61873510 | G | T | 341.129 | 0.0464 | 0.0084 | 3.28E-08 | 0.301 |  | 0.006686 | 0.024371 | 0.783809 | 0.300756 |
| rs6484367 | G | A | 412.5966 | 0.0468 | 0.0077 | 1.13E-09 | 0.5027 |  | 0.009491 | 0.022145 | 0.668213 | 0.501124 |
| rs679880 | G | A | 350.7037 | 0.0495 | 0.0089 | 2.53E-08 | 0.745 |  | 0.038638 | 0.025413 | 0.128409 | 0.745962 |
| rs76229479 | A | C | 407.2529 | -0.078 | 0.0131 | 2.64E-09 | 0.0988 |  | -0.00236 | 0.037095 | 9.49E-01 | 0.099151 |

EA: Effect allele; OA: Other allele; EAF: Effect allele frequency; OSA: Obstructive sleep apnea; TMD: Temporomandibular disorders; MR: Mendelian randomization.

Supplementary Table 2. Detail information of selected SNPs for MR analysis in TMD and OSA.

| SNP | EA | OA | Exposure (TMD) | | | | |  | Outcome (SA) | | | |
| --- | --- | --- | --- | --- | --- | --- | --- | --- | --- | --- | --- | --- |
| F | Beta | Se | P-value | EAF |  | Beta | Se | P-value | EAF |
| rs10882591 | C | T | 1178.322 | -0.19763 | 0.040222 | 8.95E-07 | 0.090589 |  | 0.025386 | 0.01339 | 0.057979 | 0.091059 |
| rs17017794 | T | C | 872.3498 | 0.195693 | 0.042027 | 3.22E-06 | 0.066762 |  | -0.04815 | 0.015651 | 0.002096 | 0.066571 |
| rs184920366 | G | A | 796.8995 | 0.337796 | 0.073925 | 4.89E-06 | 0.01949 |  | -0.00962 | 0.029076 | 0.740681 | 0.018455 |
| rs28497436 | T | C | 922.6384 | 0.105372 | 0.022817 | 3.87E-06 | 0.349067 |  | -0.02355 | 0.008067 | 0.003505 | 0.350868 |
| rs3024577 | A | G | 945.414 | -0.10393 | 0.022632 | 4.39E-06 | 0.396668 |  | -0.00667 | 0.007841 | 0.395265 | 0.396034 |
| rs34459436 | G | A | 1028.5 | 0.108601 | 0.023777 | 4.94E-06 | 0.391898 |  | 6.33E-05 | 0.008257 | 0.993887 | 0.389523 |
| rs4739605 | C | T | 1653.636 | 0.825826 | 0.177928 | 3.46E-06 | 0.993352 |  | 0.041732 | 0.047638 | 0.381013 | 0.99337 |
| rs72695283 | T | G | 919.8036 | 0.119877 | 0.025934 | 3.79E-06 | 0.22618 |  | -0.01005 | 0.009213 | 0.27543 | 0.225775 |
| rs73082357 | G | A | 967.8302 | -0.13962 | 0.030581 | 4.98E-06 | 0.161943 |  | -0.02109 | 0.010495 | 0.044456 | 0.160793 |
| rs73123505 | G | A | 1140.509 | -0.1451 | 0.029357 | 7.71E-07 | 0.180542 |  | -0.00495 | 0.009993 | 0.620295 | 0.182034 |
| rs73220964 | A | T | 857.5643 | 0.302751 | 0.064244 | 2.45E-06 | 0.026283 |  | -0.00768 | 0.024266 | 0.75158 | 0.026592 |
| rs78441633 | C | T | 829.6879 | 0.225434 | 0.049261 | 4.73E-06 | 0.04686 |  | -0.00643 | 0.018243 | 0.724638 | 0.046539 |
| rs78674086 | A | G | 1213.742 | -0.38693 | 0.084655 | 4.86E-06 | 0.022646 |  | -0.01615 | 0.026171 | 0.53729 | 0.022236 |

EA: Effect allele; OA: Other allele; EAF: Effect allele frequency; OSA: Obstructive sleep apnea; TMD: Temporomandibular disorders; MR: Mendelian randomization.
